# Supplementary material
Source: PubMed Central journal article supplement (PMC10340791)
Supplement: NIHMS1912713-supplement-Supplementary_Materials.pdf [file NIHMS1912713-supplement-Supplementary_Materials.pdf]

Supplementary Materials for  
**Rapid recruitment and IFN- $\gamma$ -mediated activation of monocytes dictate focal  
radiotherapy efficacy**

Sirimuvva Tadepalli *et al.*

Corresponding author: Juliana Idoyaga, [jidoyaga@stanford.edu](mailto:jidoyaga@stanford.edu)

*Sci. Immunol.* **8**, eadd7446 (2023)  
DOI: 10.1126/sciimmunol.add7446

**The PDF file includes:**

Supplementary Materials and Methods  
Figs. S1 to S8  
Tables S1 to S7  
References (89–91)

**Other Supplementary Material for this manuscript includes the following:**

Data file S1  
MDAR Reproducibility Report

## **SUPPLEMENTARY MATERIALS**

### **SUPPLEMENTARY MATERIAL AND METHODS**

#### **Imaging for CRT and SRT-like**

CRT- and SRT-like-treated animals were imaged using 400 x-ray beams of energy 40 kVp and current 0.5 mA spaced over 360 degrees, allowing reconstruction of volumetric CT images at a voxel resolution of 0.4 x 0.4 x 0.4 mm. These images were then used to prescribe a radiation treatment to the animal consisting of either 2 anti-parallel beams (CRT) or a single beam (one beam CRT and SRT-like). These beams were collimated to a width of 1 cm at isocenter and prescribed to deliver a cumulative dose of 20Gy or 8Gy at isocenter. CRT treatments delivered radiation beams designed to target the subcutaneous tumor while avoiding as much underlying tissue as possible. SRT-like treatments targeted a mouse that had been positioned with its tumor protruding through a 1 cm hole in a sheet of acrylic, to mimic radiation treatments delivered for SRT. SRT-like exhibited falloff in dose with distance from the source (mean dose 20.0Gy, ranging 19.5-20.4Gy). Importantly, SRT-like resulted in significant radiation doses to normal tissues, including intestine and kidney (ranging from 16.0-18.4Gy).

#### **RT machine calibration**

Calibration of both the X-Rad SmART and the Polaris were performed quarterly using both ion chamber and film dosimetry. Half value layers were measured for these treatment beams of 1.16 mm Cu (X-Rad SmART) and 1.08 mm Cu (Polaris). For both systems, a PTW Farmer Ionization chamber was used to measure exposure in air, calculated dose rate using AAPM report TG-61 (89). Radiochromic film dosimetry was used to measure the output factors for specific shield setups relative to an open field. In addition, film dosimetry was used to assess the dose delivered outside the radiation beam for both the X-Rad SmART and the Polaris setups. In both cases, the measured dose outside the beam aperture was less than 1% of the prescribed dose.

## Western blot analysis

Tumor harvested and lysed using RIPA buffer: 25 mM Tris–HCl pH 7.6, 1% NP-40, 1% sodium-deoxycholate, 150 mM NaCl, 0.1% sodium dodecyl sulfate (SDS), and cOmplete™ EDTA-free protease inhibitor cocktail (1 tablet per 50ml of solution). Protein lysates were sonicated and mechanically disrupted with a 26-gauge needle. Protein concentration was determined using the Pierce™ BCA protein assay kit (ThermoFisher Scientific). Protein samples (25 µg/lane) were boiled for 5 min in protein loading buffer Blue (National Diagnostics) and loaded on a 10% SDS–PAGE gel. Following electrophoresis, proteins were transferred onto PVDF membrane (GVS North America), blocked in 1% milk in PBS-T (PBS with 0.1% Tween) (Fisher Scientific). Primary antibodies against STING (D2P2F; Rabbit mAb #13647, Cell Signaling) and β3-Tubulin (D65A4; XP® Rabbit mAb #5666, Cell Signaling) were added to the membrane and incubated overnight at 4 °C. Secondary antibody goat anti-rabbit-HRP (GeneTex; 1:10000 dilution) was added for 1 h at room temperature. Blots were scanned with the BioRad Chemidoc™MP to visualize protein signals and intensities.

## Antibiotic treatment

An antibiotic cocktail containing 1g/L Ampicillin (Fisher Scientific), 0.5g/L Vancomycin (Fisher Scientific), 1 g/L Neomycin (Fisher Scientific), 0.5 g/L Metronidazole (MP Biomedical LLC), and 10g/L Splenda was administered to tumor bearing mice *ad libitum* 3-days prior RT and replenished with new solution every 3-4 days until humane endpoint. Antibiotic efficacy was confirmed by testing the growth of bacterial colonies from stool.

## STING knockout MC38 cell line generation

A STING knockout MC38 cell line (MC38<sup>ΔSTING</sup>) was generated using CRISPR-Cas9. gRNA Oligos (**Table S6**; Integrated DNA Technologies) were cloned into the Cas9-expressing pX458 gRNA plasmid (Addgene #48138) using Zhang Lab target sequence-cloning protocol (<https://www.addgene.org/crispr/zhang/>). The cloning product was transfected into MC38 using

Lipofectamine 3000 (ThermoFisher) according to the manufacturer's guidelines. GFP<sup>+</sup> cells were single cell sorted 48 hrs post-transfection, expanded and analyzed by Sanger sequencing. Sanger data files and sgRNA target sequences were input into Inference of CRISPR Edits (ICE) analysis (<https://ice.synthego.com>) to determine editing efficiency and quantify generated indels. A subclone with a homozygous 1-bp deletion was chosen for experiments (**fig. S6C-E**).

## SUPPLEMENTARY FIGURES

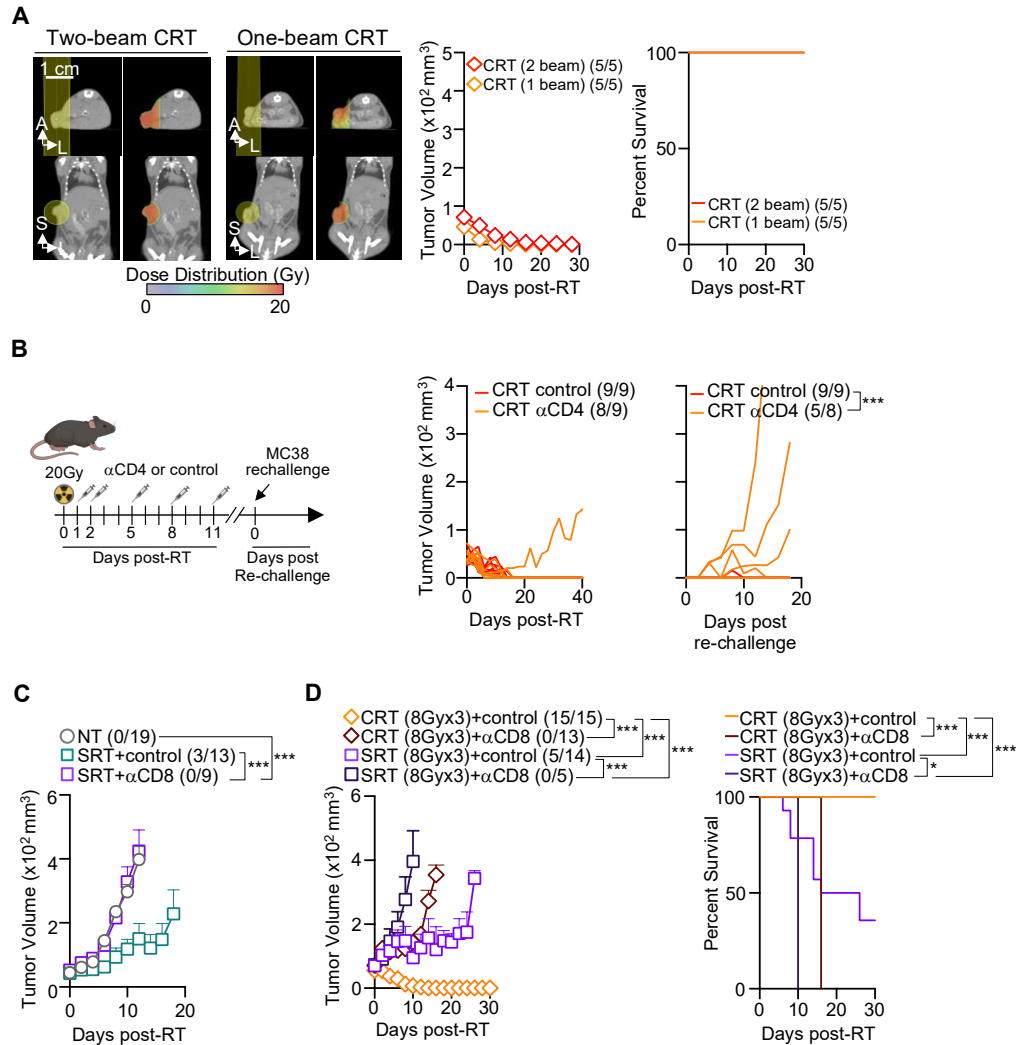

**fig. S1. T cells influence RT outcome, independently of the fractionation or delivery mode.**

**(A)** (Left) CT scans showing radiation beam orientation following two- and one-beam CRT. (Middle) Mean tumor growth + SEM with ratio of surviving mice in parenthesis. (Right) Survival curve of either one- or two-beam CRT ( $n=5/\text{group}$ , 1 exp.). **(B)** MC38-bearing mice post-CRT and 200 $\mu\text{g}$   $\alpha\text{CD4}$ /control Ab. (Left) Experimental design. (Middle) Individual mouse primary tumor growth. (Right) Individual mouse tumor growth following re-challenged with MC38 cells 50-days post-RT ( $n=8-9/\text{group}$ , 2 exp.). **(C)** Mean tumor growth + SEM of MC38-bearing mice post-SRT and 200 $\mu\text{g}$   $\alpha\text{CD8}$ /control Ab ( $n=9-19/\text{group}$ , 2-4 exp.). Ratio of surviving mice is noted in parenthesis. **(D)** MC38-bearing mice following 8Gyx3 RT and 200 $\mu\text{g}$   $\alpha\text{CD8}$ /control Ab. (Left) Mean tumor growth + SEM with ratio of surviving mice in parenthesis. (Right) Survival curve ( $n=5-15/\text{group}$ , 1-3 exp.). Statistics: Two-way ANOVA plus Tukey's post-hoc test for mean tumor growth (**A-D**), and Mantel-Cox test for survival curves (**A, D**).

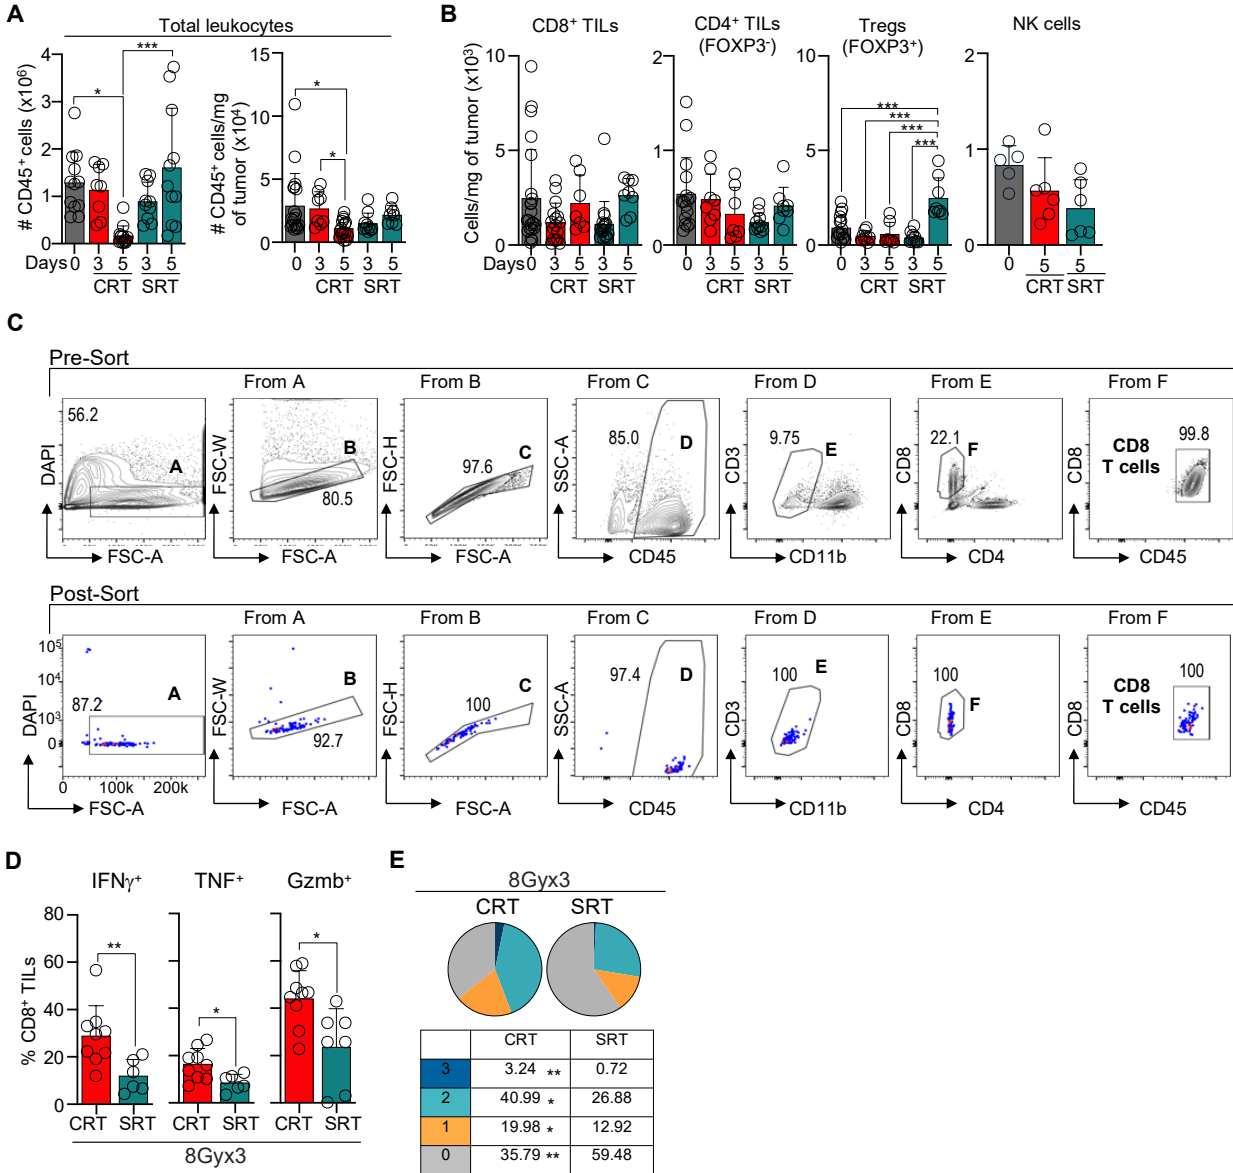

**fig. S2. CD8<sup>+</sup> TIL analysis post-RT.** (A-B) MC38-bearing mice 1-5 days post-RT or NT controls (n=5-16/group, 3-6 exp). (A) Number (left) and cells/mg of tumor (right) of CD45<sup>+</sup> cells. (B) Number of lymphocyte/mg of tumor. (C) CD8<sup>+</sup> TILs from MC38-bearing mice 3-days post-RT vs NT controls were sorted for NanoString analysis. (Top) Representative gating strategy and (bottom) post-sort purity. (D-E) MC38-bearing mice 3-days post- 8Gyx3 RT. (D) Frequency of CD8<sup>+</sup> TILs producing IFN $\gamma$ , TNF, and Gzmb, by flow cytometry (n=6-9/group, 3 exp.). (E) Boolean analyses of CD8<sup>+</sup> TILs producing 1, 2 or 3 effector molecules (n=6-9/group, 3 exp.). Statistics: One-way ANOVA plus Tukey's post-hoc test (A-B, E); Unpaired t-test (D).

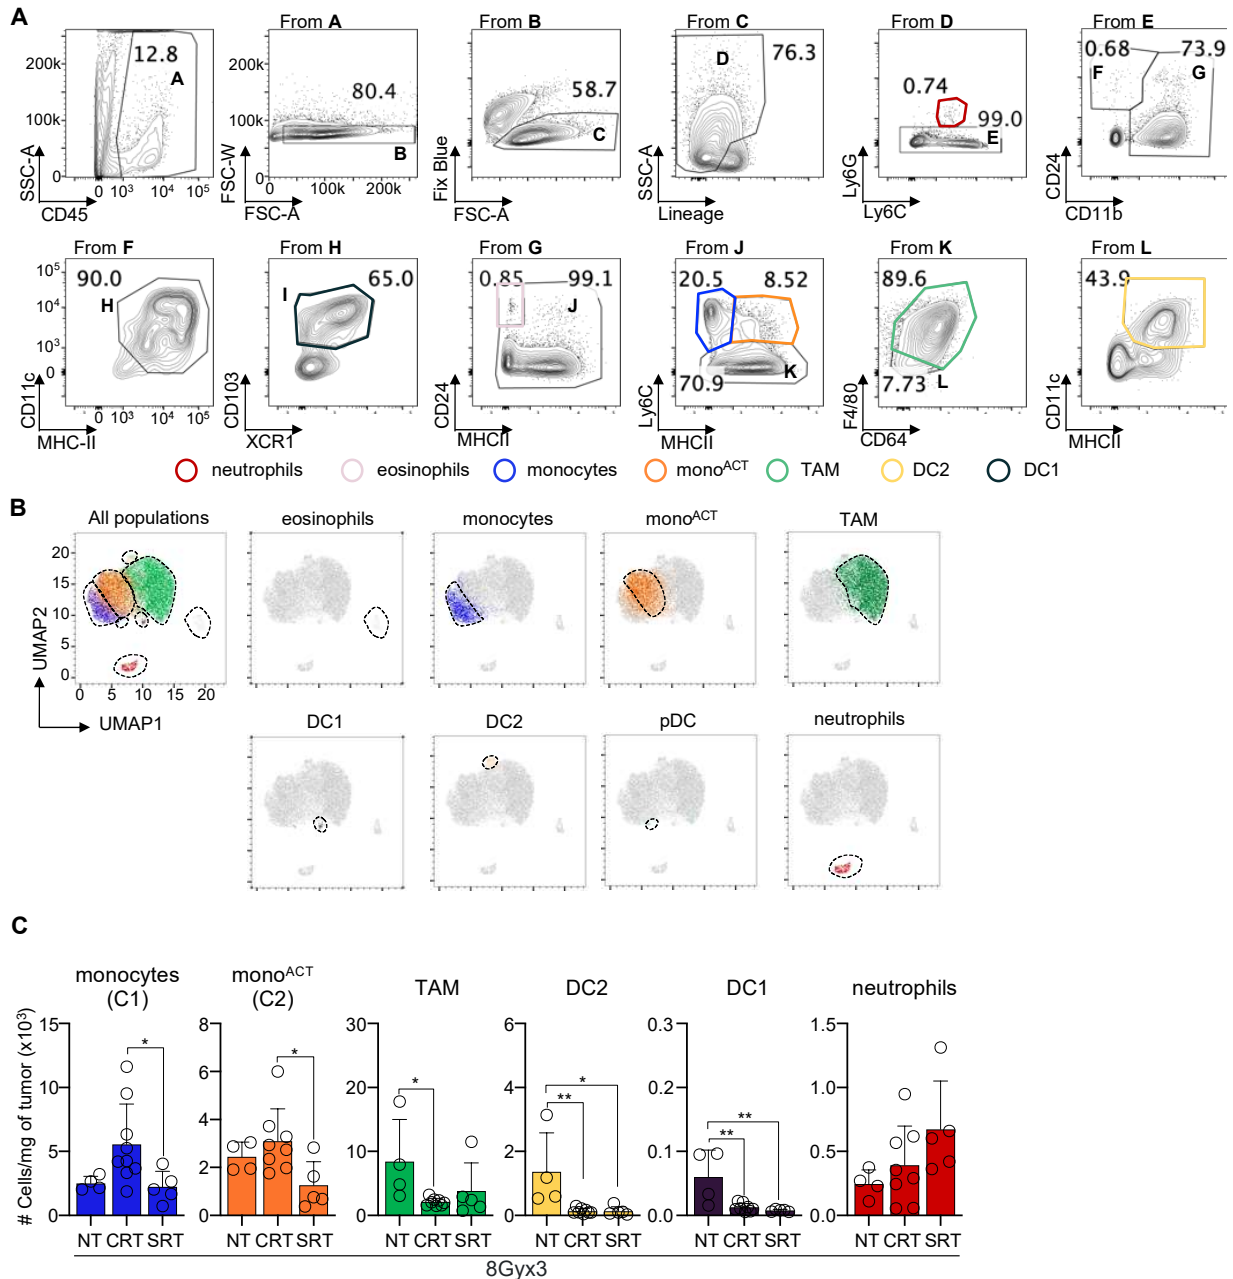

**fig. S3. Myeloid cell analysis post-RT.** (A-B) MC38-bearing mice 1- and 5-days post-RT or NT, by CyTOF. (A) Myeloid cell gating strategy based on unbiased X-shift analysis using K-nearest neighbor density estimation. Lineage staining includes CD3<sup>+</sup>, CD19<sup>+</sup>, and NK1.1<sup>+</sup> cells. (B) Myeloid cells gated as in (A), and overlaid in the unbiased UMAP generated by CyTOF analysis shown in Fig. 3A (n=3/group, 2 exp.). (C) Cells/mg of 3-days post- 8Gyx3 RT (n=4-8/group, 2-3 exp.). Statistics: One-way ANOVA plus Tukey's post-hoc test.

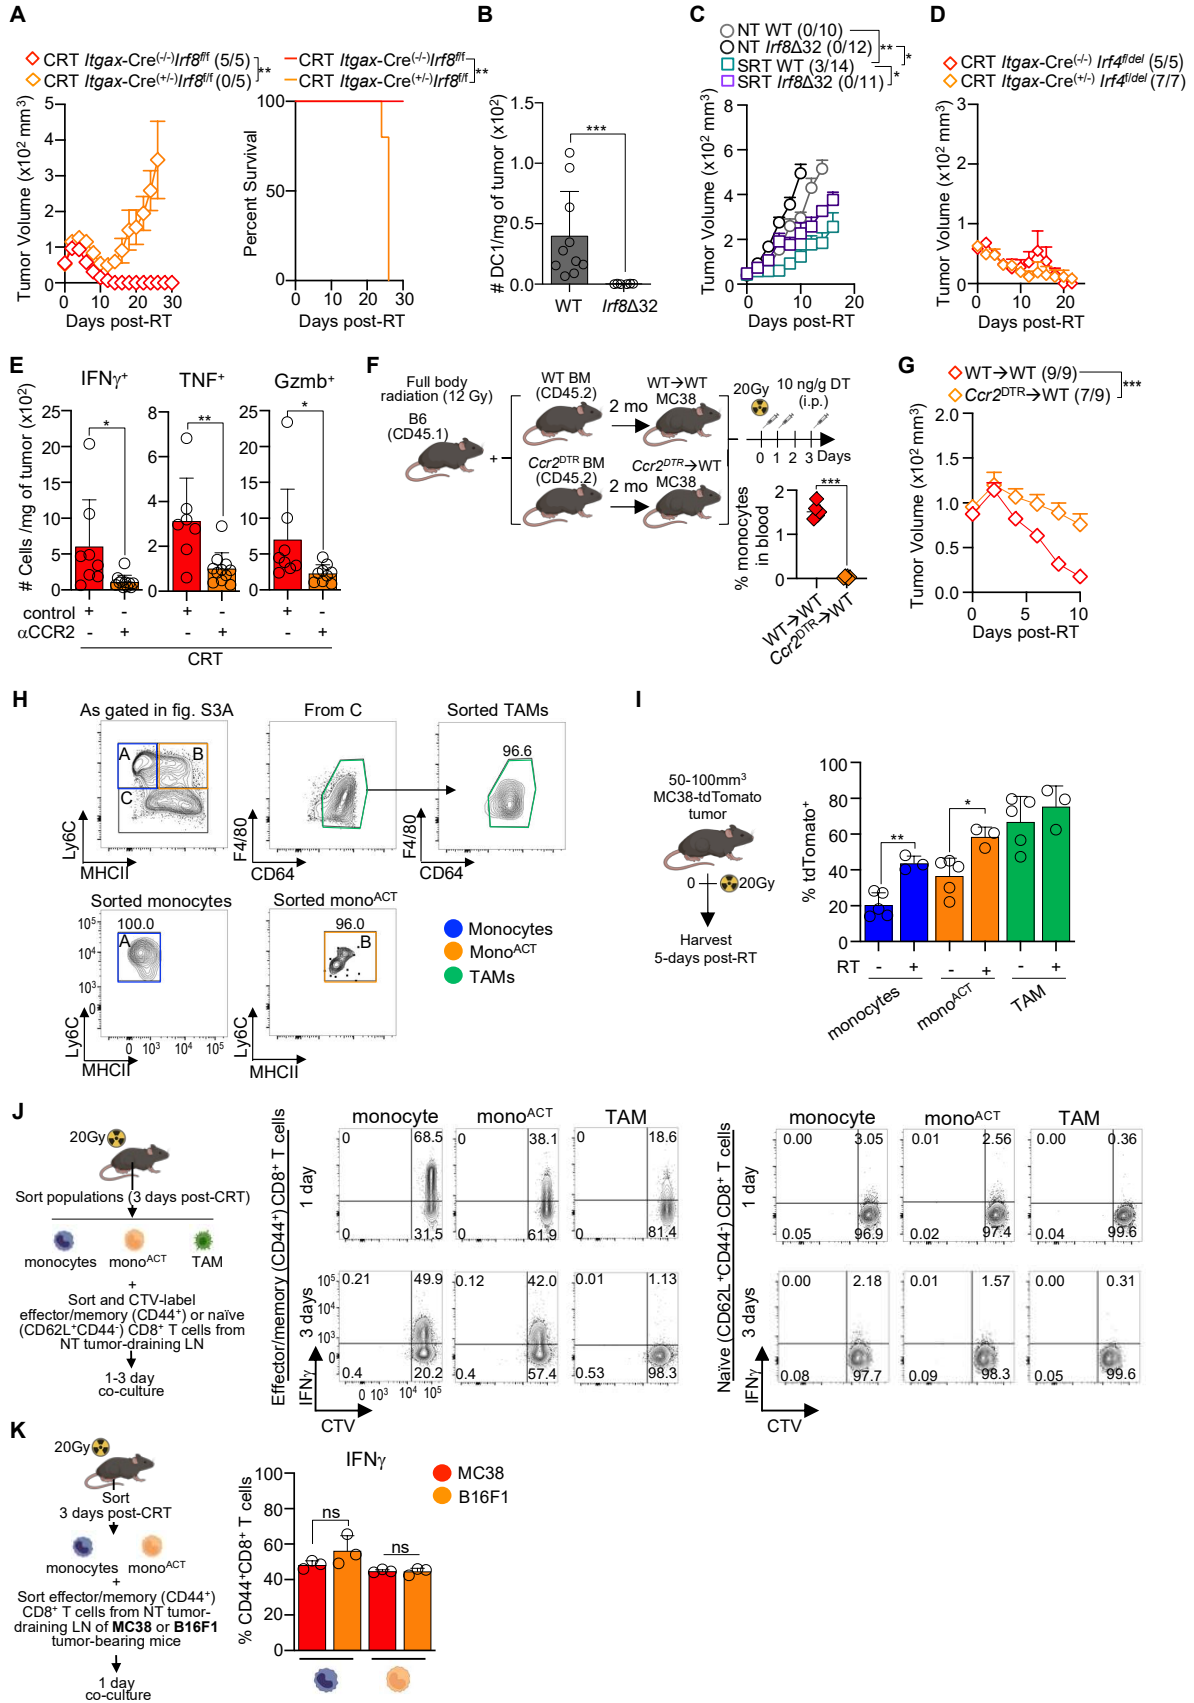



**fig. S4. Role of DC1, DC2, and monocyte post-RT.** (A) MC38-bearing *Itgax-Cre<sup>+/-</sup> xIrf8<sup>ff</sup>* or *Itgax-Cre<sup>-/-</sup> xIrf8<sup>ff</sup>* mice post-CRT (n=5/group, 1 exp.). (Left) Mean tumor growth + SEM with ratio of surviving mice in parenthesis. (Right) Survival curves. (B) Number of DC1/mg of tumor 3-days post-CRT in WT or *Irf8Δ32* mice. (C) Mean tumor growth + SEM of MC38-bearing WT or *Irf8Δ32* mice post-SRT with ratio of surviving mice in parenthesis (n=10-14/group, 2-3 exp.). (D) Mean tumor growth + SEM of MC38-bearing *Itgax-Cre<sup>+/-</sup> xIrf4<sup>fl/del</sup>* or *Itgax-Cre<sup>-/-</sup> xIrf4<sup>fl/del</sup>* mice post-CRT with ratio of surviving mice in parenthesis (n=5-7/group, 2 exp.). (E) Number of CD8<sup>+</sup> TILs/mg of tumor producing IFN $\gamma$ , TNF, and GzmB, from MC38-bearing mice 3-days post-CRT and  $\alpha$ Ccr2/control Ab, by flow cytometry (n=7-8/group, 2-3 exp.). (F-G) BMC were generated by transplanting WT or *Ccr2<sup>DTR</sup>* BM into lethally irradiated mice. Two months post-transplantation, MC38 tumors were engrafted, CRT-treated, and inoculated with diphtheria toxin (DT) administered i.p (10ng/g) on 0, 1-, and 3-days (n=9/group, 2 exp.). (F) Blood monocyte frequency following DT inoculation 3-days post-RT, by flow cytometry. (G) Mean tumor volume + SEM within the first 10 days post-CRT with ratio of surviving mice in parenthesis (n=9/group, 2 exp.). (H) Sorting strategy and purity of monocytes, mono<sup>ACT</sup>, and TAM 3-days post-RT from MC38-bearing mice (1 of 8 exp.). Cells were gated as in **fig.S3A**. (I) MC38<sup>tdTomato</sup> tumors were analyzed for the expression tumor antigen (tdTomato<sup>+</sup>) in myeloid cells 5-days post-CRT, by flow cytometry (n=3-4/group, 2 exp.). (J) Myeloid cells sorted 3-days post-CRT were co-cultured *ex vivo* with effector/memory (CD44<sup>+</sup>) or naïve (CD44<sup>-</sup>CD62L<sup>+</sup>) CTV-labeled CD8<sup>+</sup> T cells obtained from MC38-tumor draining LN. (Left) Experimental design. (Right) Representative flow cytometry experiment (n=3-5/group, 3 exp.). (K) As in (J), but CD44<sup>+</sup>CD8<sup>+</sup> T cells were obtained from MC38 or B16F1 tumor-draining LN and cultured with monocytes or mono<sup>ACT</sup> sorted from MC38 tumors 3-days post-RT (n=3/group, 2 exp.). Statistics: Two-way ANOVA plus Tukey's post-hoc test for mean tumor growth (A, C, D, G); Mantel-Cox test for survival curves (A); Unpaired t-test (B, E-F); One-way ANOVA plus Tukey's post-hoc test (I, K).

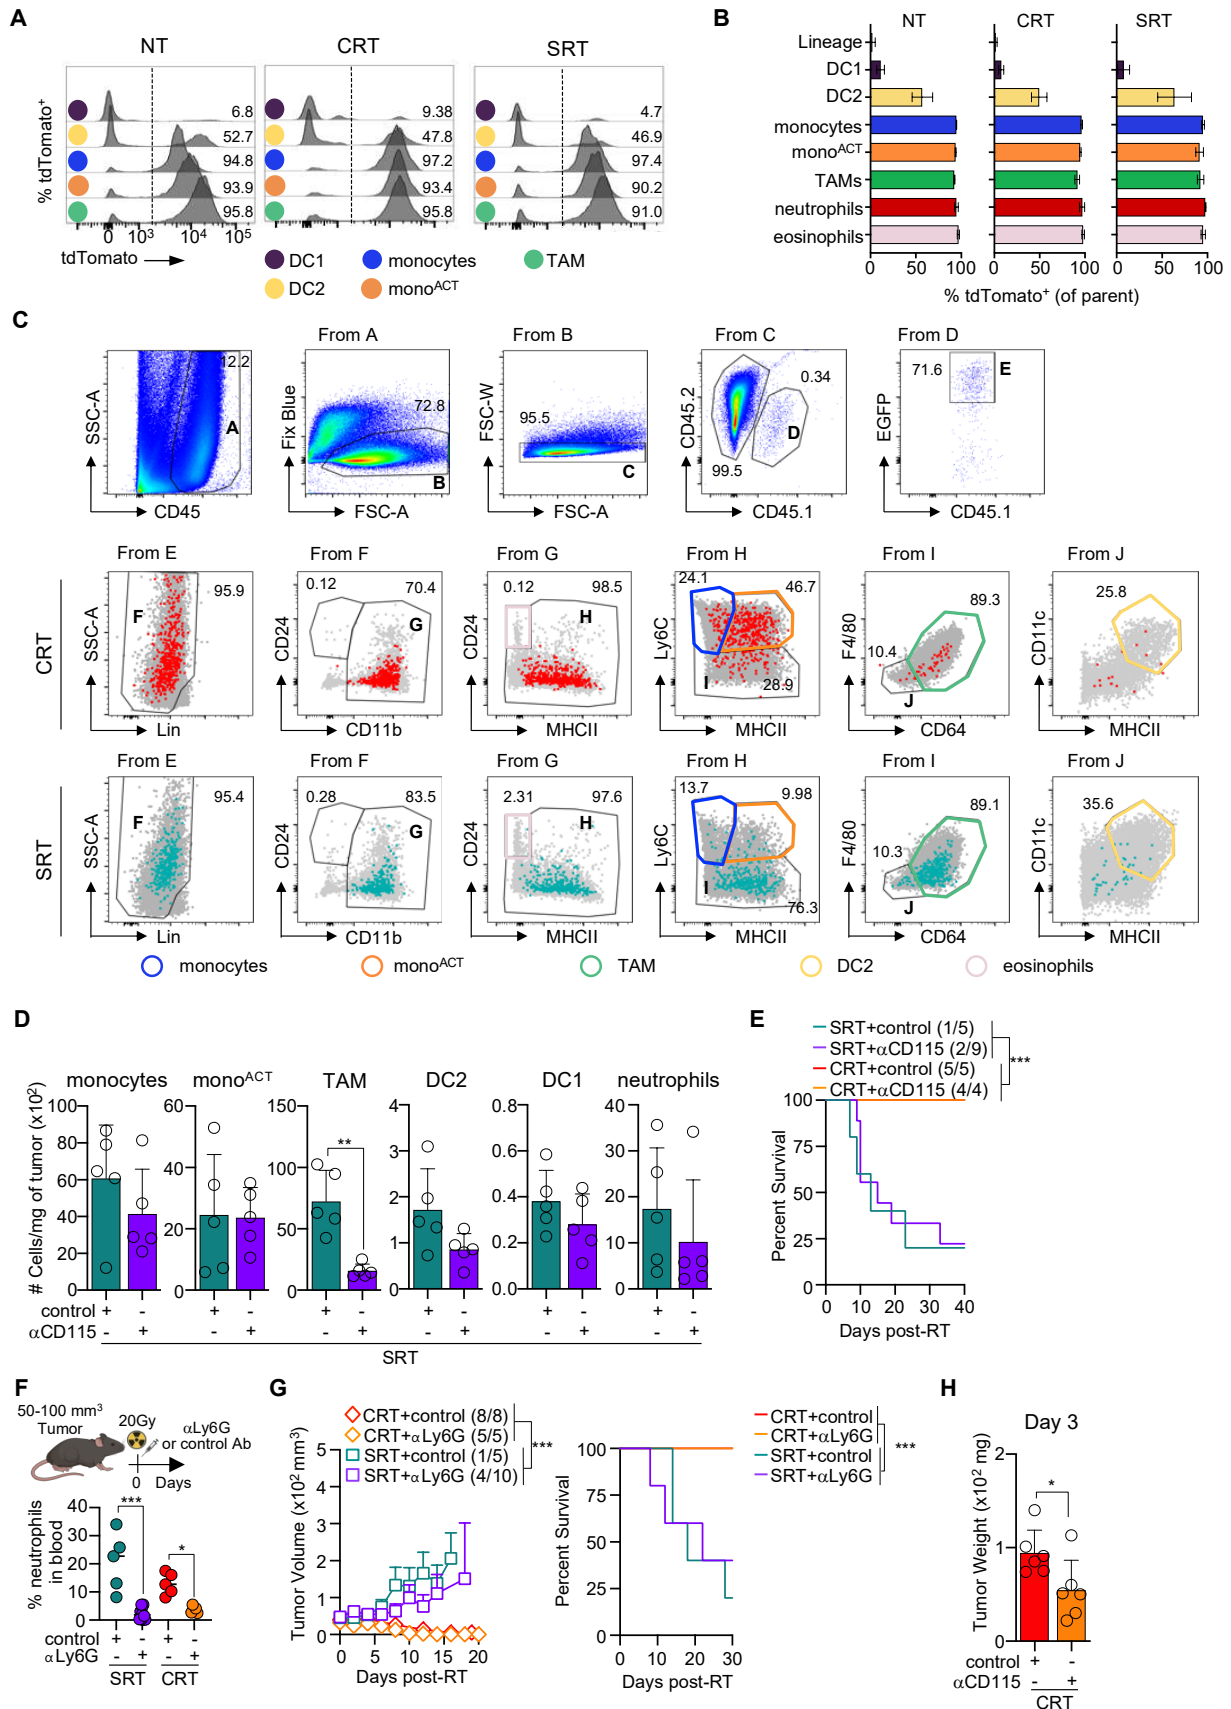

**fig. S5. Myeloid cell fate and contribution to RT efficacy. (A-B)** MC38-bearing *Ms4a3<sup>tdTomato</sup>* mice 5-days post-RT or NT (n=3-4/group, 2-3 exp.). **(A)** Representative histograms showing tdTomato expression in each cell population, by flow cytometry. **(B)** As in A, but percentage of tdTomato<sup>+</sup> cells per population. **(C)** BM CD45.1 monocytes from *Cx3cr1<sup>EGFP</sup>* mice were negatively enriched and adoptively transferred into MC38-bearing B6 (CD45.2) mice 1-2 hrs post-CRT. (Top) Gating strategy to identified CD45.1 adoptively transferred cells in tumors, by flow cytometry. (Middle and bottom) Phenotype of donor CD45.1 cells from CRT (red) and SRT (teal) tumors overlaid over CD45.2 host cells (gray). **(D-E)** MC38-bearing mice post-RT and  $\alpha$ CD115/control Ab inoculation. **(D)** Cell number/mg tumor 3-days post-SRT (n=5/group, 2 exp.). **(E)** Survival curve with ratio of surviving mice in parentheses (n=5/group, 2 exp.). **(F-G)** MC38-bearing mice post-RT and one dose of 200 $\mu$ g  $\alpha$ Ly6G/control Ab the day of RT. **(F)** Blood neutrophil frequency 2-days post-RT (n=5-10/group, 2 exp.) **(G)** (Left) Mean tumor growth + SEM curves with ratio of surviving mice in parenthesis. (Right) Survival curve. **(H)** As in D, tumor weight (mg) 3-days post-CRT (n=6/group, 2-3 exp.). Statistics: Unpaired t-test (**D, H**); Mantel-Cox test for survival curves (**E, G**); One-way ANOVA plus Tukey's post-hoc test (**F**); Two-way ANOVA plus Tukey's post-hoc test for mean tumor growth (**G**).

**A**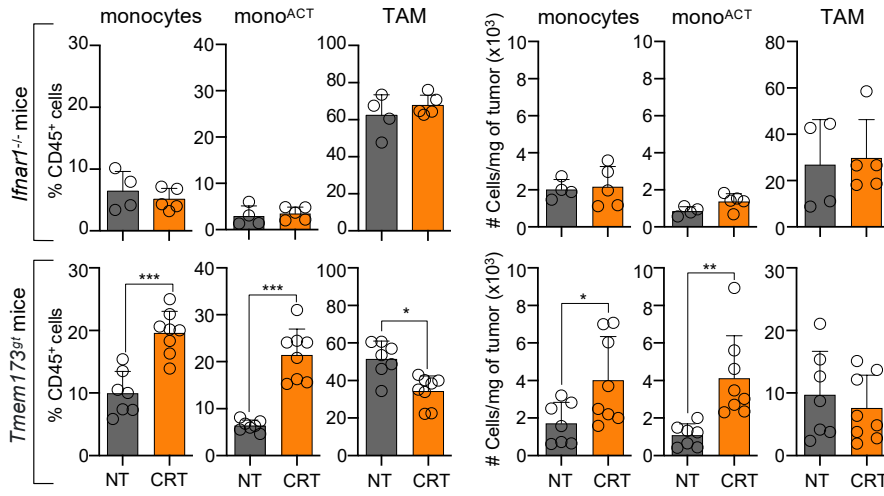**B**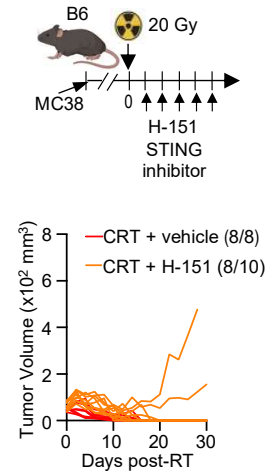**C**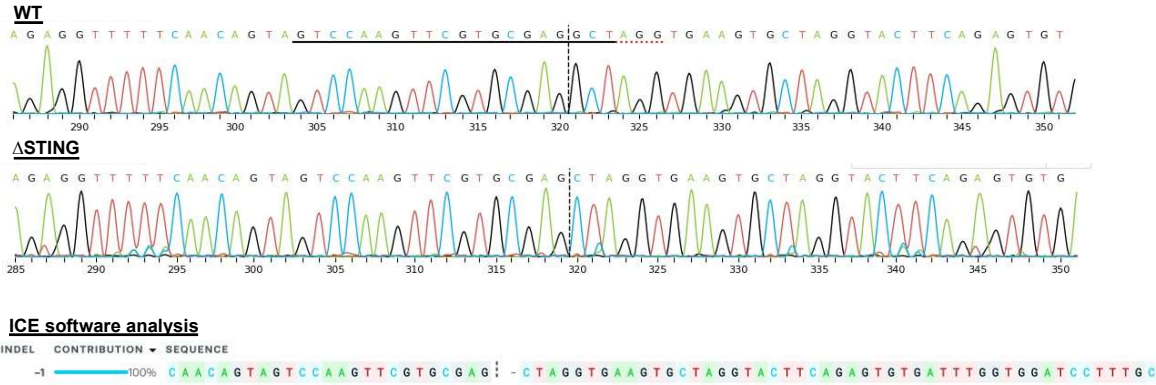**D**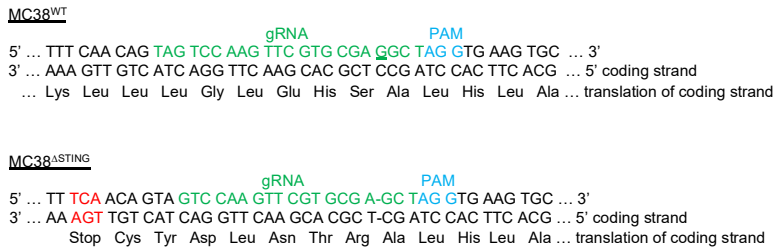**E**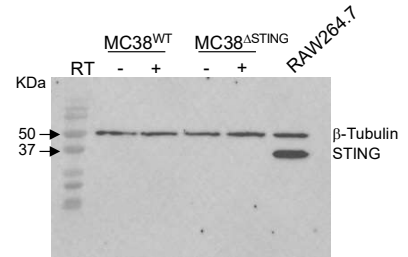**F**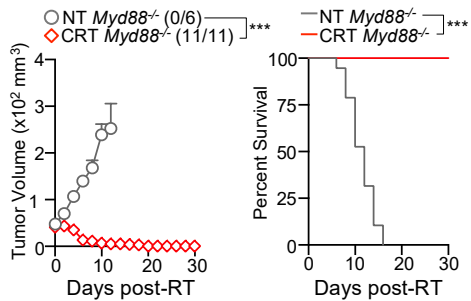**G**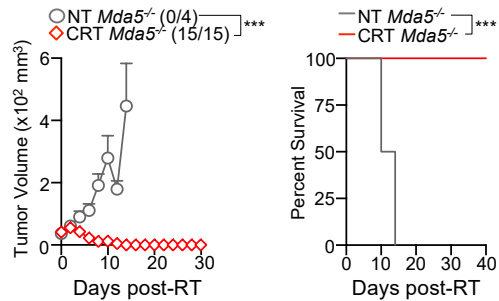

**fig. S6. CRT-mediated immune response is independent of STING, MyD88 and MDA5. (A)** MC38-bearing *Ifnar1<sup>-/-</sup>* and *Tmem173<sup>gt</sup>* mice 3-days post-CRT. Shown are myeloid cell frequencies (left) and numbers/mg of tumor (right), by flow cytometry (n=4-8/group, 2-3 exp.). **(B)** Individual tumor growth curves of MC38-bearing mice post-CRT, with STING inhibitor H-151 or vehicle (inoculated 1-5 days post-RT) (n=8-10/group, 2 exp.). **(C)** Sanger sequencing chromatograms of MC38<sup>WT</sup> and MC38<sup>ASTING</sup> cell clones. Line depicts gRNA position (above). Protospacer-adjacent motif (PAM) is marked with red dashed line. ICE software analysis of Sanger sequencing data confirmed a homozygous 1bp deletion in the MC38<sup>ASTING</sup> cell (below). **(D)** Predicted effect at DNA and protein levels following 1bp deletion in the MC38<sup>ASTING</sup>. gRNA, PAM and premature stop codon are shown in green, blue and red, respectively. **(E)** MC38<sup>WT</sup> and MC38<sup>ASTING</sup> cells were analyzed for the expression of STING, by Western blot. Cells were left untreated (NT) or treated with 20Gy radiation *in vitro* followed by 24 hrs culture.  $\beta$ -Tubulin was used as the loading control. RAW264.7 cells were used as positive control for STING expression. One representative experiment of 3 is shown. **(F-G)** MC38-bearing *Myd88<sup>-/-</sup>* and *Mda5<sup>-/-</sup>* post-CRT vs NT (n=4-15/group, 2-3 exp.). (Left panels) Mean tumor growth + SEM with ratios of surviving mice in parenthesis. (Right panels) Survival curves. Statistics: Unpaired t-test **(A)**; Two-way ANOVA plus Tukey's post-hoc test for tumor growth curves **(B, F, G)**; Mantel-Cox test for survival curves **(F, G)**.

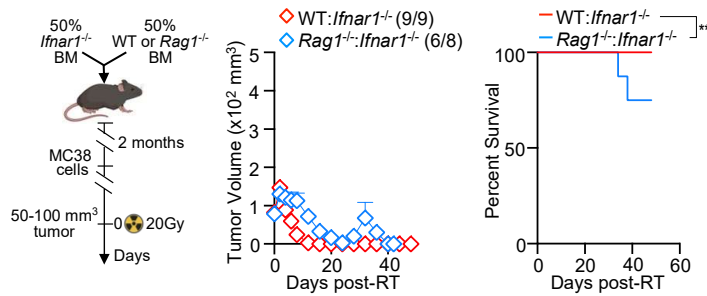

**fig. S7. CRT-mediated immune response is only partially dependent on IFN-I signaling in T cells.**

BMC were generated by the transplanting 50% *Ifnar1*<sup>-/-</sup> BM and 50% WT or *Rag1*<sup>-/-</sup> BM into lethally irradiated CD45.1 mice. Transplantation was established for 2 months prior to MC38 engraftment and CRT treatment. (Left) Experimental design. (Middle) Mean tumor volume + SEM with ratios of surviving mice in parenthesis. (Right) Survival curve (n=8-9/group, 2 exp.). Statistics: Two-way ANOVA plus Tukey's post-hoc test for mean tumor growth curves; Mantel-Cox test for survival curves.

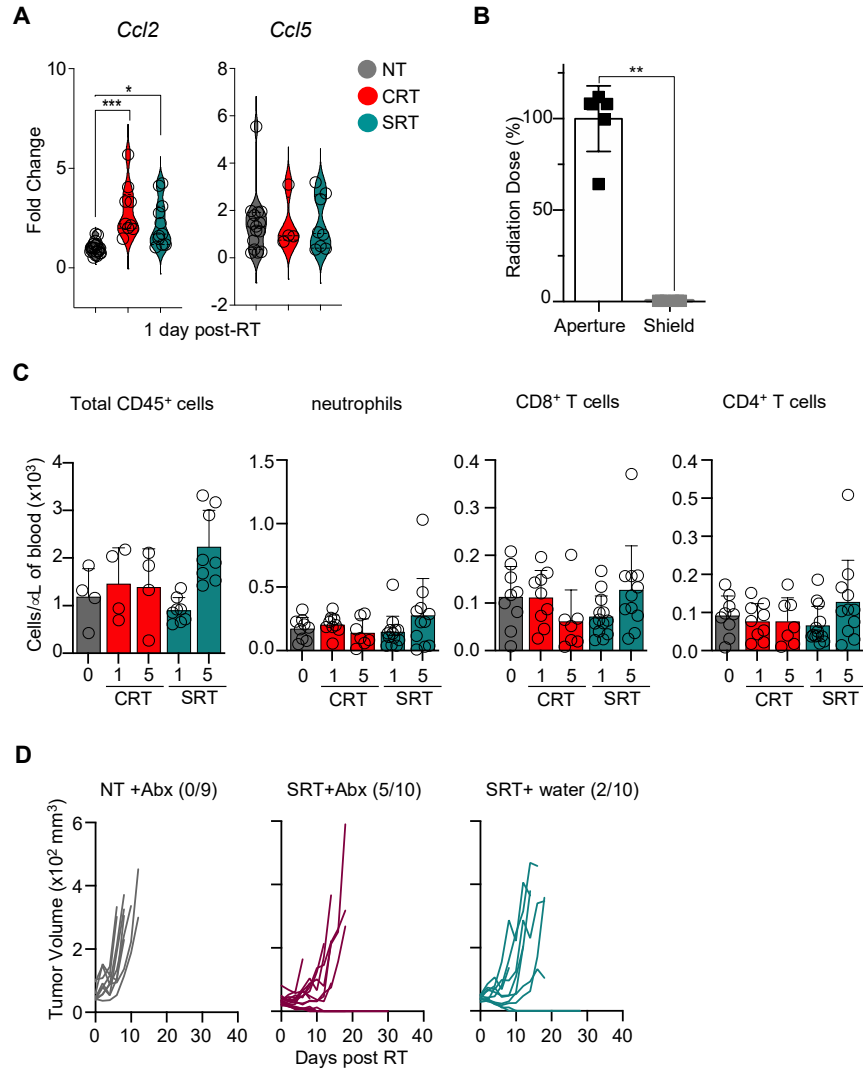

**fig. S8. SRT does not promote systemic radiation toxicity.** (A) Tumors from MC38-bearing mice were analyzed 1-day post-RT for the expression of *Ccl2* and *Ccl5*, by qPCR (n=4-17/group, 2-3 exp). (B) Radiation dose (relative percent change) measured through the aperture and behind the lead shield using radio-chromic film dosimeter (Gafchromic EBT-3 film) (n=6/group, 1 exp.). (C) MC38-bearing mice post-RT. CD45<sup>+</sup> cells, neutrophils, CD8<sup>+</sup> and CD4<sup>+</sup> T cells 1- and 5-days post-RT per  $\mu$ L of blood (n=4-13/group, 2-3 exp.). (D) MC38-bearing mice post-SRT and oral antibiotic cocktail treatment. Individual mouse tumor growth curves with ratio of surviving mice in parentheses (n=9-10/group, 2-3 exp.). Statistics: One-way ANOVA plus Tukey's post-hoc test (A,C); Unpaired t-test (B); Two-way ANOVA plus Tukey's post-hoc test for tumor growth curves (D).

## SUPPLEMENTARY TABLES

**Table S1. List of animals**

| Mouse Strain with common names in parenthesis                                   | Origin                          |
|---------------------------------------------------------------------------------|---------------------------------|
| C57BL/6J (B6)                                                                   | Jackson laboratory (Jax#000664) |
| <i>Tmem173<sup>gt</sup></i>                                                     | Jackson laboratory (Jax#017537) |
| <i>Braf<sup>CA</sup> x Pten<sup>flf</sup> x Tyr<sup>CreER</sup></i> (BRaf/Pten) | Jackson laboratory (Jax#013590) |
| <i>Ccr2<sup>-/-</sup></i>                                                       | Jackson laboratory (Jax#004999) |
| <i>Rag1<sup>-/-</sup></i>                                                       | Jackson laboratory (Jax#002216) |
| <i>Itgax-Cre</i>                                                                | Jackson laboratory (Jax#008068) |
| <i>Irf4<sup>flf</sup></i>                                                       | Jackson laboratory (Jax#009380) |
| <i>Irf8<sup>flf</sup></i>                                                       | Jackson laboratory (Jax#014175) |
| <i>Lyz2<sup>Cre</sup></i>                                                       | Jackson laboratory (Jax#004781) |
| <i>Csf1r<sup>LSL-DTR</sup></i>                                                  | Jackson laboratory (Jax#024046) |
| <i>Ifnb1<sup>EYFP</sup></i> ( <i>Ifnb<sup>mob</sup></i> )                       | Jackson laboratory (Jax#010818) |
| <i>Ifnar1<sup>-/-</sup></i>                                                     | Jackson laboratory (Jax#032045) |
| <i>Foxp3<sup>DTR</sup></i>                                                      | Jackson laboratory (Jax#016958) |
| <i>Cx3cr1<sup>EGFP</sup></i>                                                    | Jackson laboratory (Jax#008451) |
| <i>Myd88<sup>-/-</sup></i>                                                      | Jackson laboratory (Jax#009088) |
| <i>Mda5<sup>-/-</sup></i>                                                       | Jackson laboratory (Jax#015812) |
| Ai9(RCL-tdT) ( <i>Rosa<sup>LSL-tdTomato</sup></i> )                             | Jackson laboratory (Jax#007905) |
| B6-Ly5.1/Cr (CD45.1)                                                            | Charles River (Cat#564)         |
| <i>Irf8Δ32</i>                                                                  | Jackson laboratory (Jax#032744) |
| <i>Ccr2<sup>DTR</sup></i>                                                       | Obtained from Dr. Lavine (54)   |
| <i>Ms4a3<sup>Cre</sup></i>                                                      | Obtained from Dr. Ginhoux (56)  |
| <i>Ms4a3<sup>Cre</sup> x Rosa<sup>LSL-tdTomato</sup></i>                        | In-house breeding (56)          |
| <i>Itgax-Cre x Irf8<sup>flf</sup></i>                                           | In-house breeding (48)          |
| <i>Itgax-Cre x Irf4<sup>flf/del</sup> **</i>                                    | In-house breeding (52)          |
| <i>Lyz2<sup>Cre</sup> x Csf1r<sup>LSL-DTR</sup></i> (MM <sup>DTR</sup> )        | In-house breeding(55)           |

\*\*As previously reported, this mouse strain frequently generates germline deletions, which were detected by genotyping (53). Although we did not detect immunological differences, all our experiments included *Irf4<sup>flf</sup>* and *Irf4<sup>flf/del</sup>* mice as controls.



**Table S2. List of cell lines**

List of cell-lines used for *in vivo* and *in vitro* experiments.

| <b>Cell lines</b>        | <b>Source</b>                                                          | <b>Species</b> | <b>References</b> |
|--------------------------|------------------------------------------------------------------------|----------------|-------------------|
| MC38                     | Engleman Lab Stanford University (NCI DCTD tumor/cell line repository) | Mus musculus   | (90)              |
| MC38 <sup>tdTomato</sup> | Engleman Lab Stanford University (in house)                            | Mus musculus   | N/A               |
| MC38 <sup>ΔSTING</sup>   | This manuscript                                                        | Mus musculus   | N/A               |
| LLC                      | Garcia Lab Stanford University (ATCC)                                  | Mus musculus   | CLR1642           |
| E0771                    | ATCC                                                                   | Mus musculus   | CRL-3461          |
| RAW264.7                 | ATCC                                                                   | Mus musculus   | TIB-71            |
| B16F1                    | ATCC                                                                   | Mus musculus   | CRL-6323          |

**Table S3. List of critical commercial assays and reagents**

| <b>Critical commercial Assays</b>                           | <b>Company</b>               | <b>Cat#</b>   |
|-------------------------------------------------------------|------------------------------|---------------|
| 1x Glutamine                                                | Corning                      | 25-005-CI     |
| 1x Penicillin/Streptomycin                                  | Gibco                        | 15140-122     |
| 2-Mercaptoethanol                                           | Gibco                        | 21985-023     |
| 4-hydroxytamoxifen                                          | Millipore-Sigma              | H6278-10MG    |
| ACK Lysing Buffer (Gibco)                                   | Thermo Fisher Scientific     | A1049201      |
| anhydrous acetonitrile                                      | Thermo Fisher Scientific     | 271004        |
| Anti-Biotin Microbeads                                      | Milteni Biotec               | 130-090-485   |
| BD Cytofix/Cytoperm Fixation and Permeabilization solution  | BD Biosciences               | 554714        |
| BD Perm/Wash™ Buffer                                        | Fisher scientific            | BD554723      |
| Brefeldin A                                                 | Millipore-Sigma              | B6542-25MG    |
| CellTrace™ Violet Cell Proliferation Kit                    | Invitrogen™                  | C34557        |
| Cell-ID Cisplatin                                           | Fluidigm                     | 201064        |
| Collagenase D (COLLD-RO Roche)                              | Millipore-Sigma              | 11088882001   |
| cOmplete™ EDTA-free protease inhibitor cocktail (Roche)     | Millipore-Sigma              | 11873580001   |
| CountBright™ Absolute Counting beads                        | Thermo Fisher Scientific     | C36950        |
| Corning™ EDTA (0.5M)                                        | Corning                      | 46034CI       |
| Diphtheria Toxin from Corynebacterium diphtheriae           | Millipore-Sigma              | D0564         |
| DMEM media                                                  | Corning                      | 10-027-CV     |
| DNase (Roche)                                               | Millipore-Sigma              | 4716728001    |
| DPBS (Dulbecos Phosphate Buffered Saline)                   | Corning                      | 21-030-CV     |
| Dynabeads™ Sheep Anti-Rat IgG                               | Thermo Fisher Scientific     | 11035         |
| EDTA                                                        | Thermo Fisher Scientific     | 15576028      |
| Fetal bovine Serum (FBS)                                    | Gibco                        | 26140079      |
| FITC-dextran-4KDa                                           | Millipore-Sigma              | 46944-500MG-F |
| Foxp3 Transcription Factor Fixation/Permeabilization buffer | Thermo Fisher Scientific     | 00-5521-00    |
| Hank's Balanced Salt Solution (HBSS)                        | Corning                      | 21-023-CV     |
| Ionomycin calcium salt from Streptomyces conglobatus        | Millipore-Sigma              | I0634-5MG     |
| Indium 115 metal chloride                                   | Trace Sciences International | In-115        |
| iScript Reverse Transcription Supermix                      | Bio-Rad                      | 1708841       |
| Itaq Universal SYBR                                         | Bio-Rad                      | 1725121       |
| LIVE/DEAD™ Fixable Blue Dead Cell Stain Kit                 | Invitrogen™                  | L23105        |
| Na <sub>3</sub> VO <sub>4</sub>                             | Millipore-Sigma              | S6508         |
| NaCl                                                        | Fisher scientific            | S271-3        |

|                                                                          |                              |           |
|--------------------------------------------------------------------------|------------------------------|-----------|
| NAF                                                                      | Millipore-Sigma              | 201154    |
| NaN3                                                                     | Millipore-Sigma              | 769320    |
| NanoString nCounter® Mouse Immune Exhaustion Panel V2 Standard Platforms | NanoString                   | 115000476 |
| NanoString nCounter® Mouse Myeloid Innate Immunity V2 Standard Platforms | NanoString                   | 115000181 |
| NP40                                                                     | Fisher Scientific            | NC9168253 |
| Paraformaldehyde 16% aqueous solution                                    | Electron Microscopy Sciences | 15710     |
| Phorbol 12-myristate 13-acetate (PMA)                                    | Millipore-Sigma              | P8139-1MG |
| Pierce™ BCA Protein Assay Kit                                            | Thermo Fisher Scientific     | 23225     |
| RPMI media                                                               | Corning                      | 10-040-CV |
| Sodium-deoxycholate                                                      | Millipore-Sigma              | 30970     |
| Sodium dodecyl sulfate (SDS)                                             | Millipore-Sigma              | L3771     |
| Sodium Pyruvate Solution                                                 | Corning                      | 25000CI   |
| STING inhibitor (H-151)                                                  | Invivogen                    | inh-h151  |
| Trypsin gold, Mass spectrometry Grade                                    | Promega                      | V5280     |
| TMTpro™ 16plex Label Reagent Set                                         | Thermo Fisher Scientific     | A44520    |
| Tris-HCl, pH 7.4                                                         | Fisher scientific            | BP152-1   |
| VeriKine-HSTM mouse IFN beta Serum ELISA Kit                             | PBL assay science            | 42410     |

**Table S4. List of flow cytometry antibodies**

| <b>Antibody</b>                                | <b>Source</b>  | <b>Cat#</b> | <b>RRID</b>       |
|------------------------------------------------|----------------|-------------|-------------------|
| Anti-mouse B7-H1 (MIH5) SuperBright 780        | eBioscience    | 78-5982-82  | RRID: AB_2724081  |
| Anti-mouse CD11b (M1/70) BV650                 | BioLegend      | 101239      | RRID: AB_11125575 |
| Anti-mouse CD11b (M1/70) eFluor®450            | eBioscience    | 48-0112     | RRID: AB_1582237  |
| Anti-mouse CD11c (HL3) BUV737                  | BD Biosciences | 612796      | RRID: AB_2870123  |
| Anti-mouse CD11c (HL3) PE-Cy7                  | BD Biosciences | 558079      | RRID: AB_647251   |
| Anti-mouse CD19 (6D5) Alexa Fluor® 700         | BioLegend      | 115528      | RRID: AB_493735   |
| Anti-mouse CD19 (eBio1D3) APC-eFluor®780       | eBioscience    | 47-0193-82  | RRID: AB_10853189 |
| Anti-mouse CD19 (eBioD3) eFluor®450            | eBioscience    | 48-0193-82  | RRID: AB_2734905  |
| Anti-mouse CD24 (M1/69) APC-eFluor®780         | eBioscience    | 47-0242-80  | RRID: AB_10853190 |
| Anti-mouse CD24 (M1/69) BUV395                 | BD Biosciences | 744471      | RRID: AB_2742259  |
| Anti-mouse CD25 (PC61) PerCP Cy5.5             | BioLegend      | 102030      | RRID: AB_893288   |
| Anti-mouse CD3e (145-2C11) APC-eFluor®780      | eBioscience    | 47-0031-82  | RRID: AB_11149861 |
| Anti-mouse CD3e (17A2) Alexa Fluor® 700        | BioLegend      | 100216      | RRID: AB_493697   |
| Anti-mouse CD4 (GK1.5) BUV395                  | BD Biosciences | 563790      | RRID: AB_2738426  |
| Anti-mouse CD44 (IM7) BV785                    | BioLegend      | 103041      | RRID: AB_11218802 |
| Anti-mouse CD44 (IM7) PE-Cy7                   | BioLegend      | 103030      | RRID: AB_830787   |
| Anti-mouse CD45 (30-F11) Brilliant Violet 510™ | BioLegend      | 103138      | RRID: AB_2563061  |
| Anti-mouse CD45 (30-F11) BV785                 | BioLegend      | 103149      | RRID: AB_2564590  |
| Anti-mouse CD45 (30-F11) FITC                  | BioLegend      | 103108      | RRID: AB_312973   |
| Anti-mouse CD45.1 (A20) FITC                   | eBioscience    | 11-0453-82  | RRID: AB_465058   |
| Anti-mouse CD45.2 (104) PE-Cy7                 | BioLegend      | 109830      | RRID: AB_1186098  |
| Anti-mouse CD64 (X54-5/7.1) APC                | BioLegend      | 139306      | RRID: AB_11219391 |
| Anti-mouse CD8a (53-6.7) APC-eFluor®780        | eBioscience    | 47-0081-82  | RRID: AB_1272185  |
| Anti-mouse CD8a (53-6.7) Brilliant Violet 510™ | BioLegend      | 100751      | RRID: AB_2561389  |
| Anti-mouse CD8a (53-6.7) BUV737                | BD Biosciences | 564297      | RRID: AB_2722580  |
| Anti-mouse EpCAM (G8.8) PE                     | eBioscience    | 12-5791-82  | RRID: AB_953615   |
| Anti-mouse EpCAM (G8.8) PE-Cy7                 | eBioscience    | 25-5791-80  | RRID: AB_1724047  |
| Anti-mouse F4/80 (BM8) eFluor®450              | eBioscience    | 48-4801-82  | RRID: AB_1548747  |
| Anti-mouse F4/80 (BM8) PerCP Cy5.5             | BioLegend      | 123128      | RRID: AB_893484   |
| Foxp3 Monoclonal Antibody (FJK-16s) FITC       | eBioscience    | 11-5773-82  | RRID: AB_465243   |

|                                                          |                           |             |                   |
|----------------------------------------------------------|---------------------------|-------------|-------------------|
| Anti-mouse Foxp3 (FJK-16s) APC                           | eBioscience               | 17-5773-82  | RRID: AB_469457   |
| Anti-mouse IFN $\gamma$ (XMG1.2) Alexa Fluor® 700        | BD Biosciences            | 557998      | RRID: AB_396979   |
| Anti-mouse Ly6C (HK1.4) Alexa Fluor® 700                 | BioLegend                 | 128024      | RRID: AB_10643270 |
| Anti-mouse Ly6C (HK1.4) eFluor®450                       | ebiosciences              | 48-5932-82  | RRID: AB_10805519 |
| Anti-mouse Ly6G (1A8) Alexa Fluor® 700                   | BioLegend                 | 127622      | RRID: AB_10643269 |
| Anti-mouse MHCII (M5/114.15.2) Brilliant Violet 510™     | BioLegend                 | 107635      | RRID: AB_2561397  |
| Anti-mouse NK1.1 (PK136) Alexa Fluor® 700                | BioLegend                 | 108730      | RRID: AB_2291262  |
| Anti-mouse NK1.1 (PK136) APC-eFluor®780                  | eBioscience               | 47-5941-82  | RRID: AB_2735070  |
| Anti-mouse PD-1 (J43) Superbright 780                    | eBioscience               | 78-9985-82  | RRID: AB_2734947  |
| Anti-mouse PD-1 (J43) PE                                 | eBioscience               | 12-9985-82  | RRID: AB_466295   |
| Anti-mouse SiglecH (551) APC                             | BioLegend                 | 129611      | RRID: AB_10643574 |
| Anti-mouse TNF $\alpha$ (MP6-XT22) Brilliant Violet 650™ | BioLegend                 | 506333      | RRID: AB_2562450  |
| Anti-mouse XCR1 (ZET) FITC                               | BioLegend                 | 148210      | RRID: AB_2564366  |
| Anti-mouse XCR1 (ZET) PerCP Cy5.5                        | BioLegend                 | 148208      | RRID: AB_2564364  |
| Anti-mouse/human Granzyme B (GB11) Alexa Fluor® 647      | BioLegend                 | 515406      | RRID: AB_2566333  |
| Anti-mouse/human TOX (REA473) PE                         | Miltenyi Biotec           | 130-120-716 | RRID: AB_2801780  |
| Anti-mouse/human TCF1/TCF7 Alexa Fluor®488 (C63D9)       | Cell Signaling Technology | 6444        | RRID: AB_2797627  |
| Anti-mouse LAG-3 (C9B7W) PE-Cy7                          | BioLegend                 | 125225      | RRID: AB_2715763  |
| Anti-mouse INOS (CXNFT) PE                               | eBioscience               | 12-5920-82  | RRID: AB_2572642  |
| Anti-mouse pro-IL1b (NJTEN3) PE                          | eBioscience               | 12-7114-80  | RRID: AB_10736472 |
| Anti-mouse PD-L1 (MIH5) Superbright 780                  | eBioscience               | 78-5982-82  | RRID: AB_2724081  |
| Anti-mouse CD86 (GL1) Alexa Fluor® 700                   | BioLegend                 | 105023      | RRID: AB_493720   |
| Anti-mouse CD43 (S11) Alexa Fluor® 700                   | BioLegend                 | 143213      | RRID: AB_2800660  |
| Anti-mouse CD62L (MEL-14) PE-Cy7                         | BioLegend                 | 104418      | RRID: AB_313103   |
| Anti-mouse CD45 (30-F11) Biotin                          | BioLegend                 | 103103      | RRID: AB_312968   |

**Table S5. List of CyTOF antibodies.**

| <b>Antibody</b> | <b>Clone</b> | <b>Metal</b> | <b>Company</b>                              |
|-----------------|--------------|--------------|---------------------------------------------|
| CD45            | 30-F11       | Y89          | Fluidigm RRID: AB_2651152                   |
| Ly6D            | 49-H4        | CD116        | BD Pharmingen RRID: AB_396664               |
| PDCA1           | 927          | In115        | Biolegend RRID: AB_1953281                  |
| Ly6G            | 1A8          | Pr141        | Fluidigm RRID: AB_2814678                   |
| TCF4            | NCI-R159-6   | Nd142        | Abcam RRID: AB_2714172                      |
| CD11b           | M1/70        | Nd143        | Fluidigm RRID: AB_2811240                   |
| B220            | RA3-6B2      | Nd144        | Fluidigm RRID: AB_2811239                   |
| MHC-II          | M5/114.15.2  | Nd145        | Biolegend RRID: AB_2563771                  |
| EpCAM           | G8.8         | Nd146        | Biolegend RRID: AB_2563743                  |
| CD172a          | P84          | Sm147        | Biolegend RRID: AB_11203723                 |
| CD127           | A7R34        | Nd148        | Biolegend RRID: AB_2563716                  |
| CD19            | 6D5          | Sm149        | Fluidigm RRID: AB_2814679                   |
| Ly6C            | HK1.4        | Nd150        | Biolegend RRID: AB_2563783                  |
| CD64            | X54-5/7.1    | Eu151        | Fluidigm RRID: AB_2814680                   |
| TCR beta        | H57-597      | Sm152        | Biolegend RRID: AB_2562804                  |
| CD335 (NKp46)   | 29A1.4       | Eu153        | Biolegend RRID: AB_2563744                  |
| CD24            | M1/69        | Sm154        | Biolegend RRID: AB_2563732                  |
| FcεR1alpha      | MAR_1        | Gd155        | Biolegend RRID: AB_2563768                  |
| CD14            | Sa14-2       | Gd156        | Fluidigm RRID: AB_2814681                   |
| IRF4            | IRF4.3E4     | Gd157        | Biolegend RRID: AB_2280462                  |
| SiglecH         | 551          | Gd158        | Biolegend RRID: AB_1227757                  |
| F4/80           | BM8          | Tb159        | Fluidigm RRID: AB_2811238                   |
| MGL2            | URA-1        | Gd160        | Biolegend RRID: AB_2562711                  |
| CD8             | 53-6.7       | Dy161        | Biolegend RRID: AB_2562796                  |
| CD11c           | N418         | Dy162        | Fluidigm RRID: AB_2814682                   |
| XCR1            | ZET          | Dy163        | Biolegend RRID: AB_2563841                  |
| CCR7            | 4B12         | Dy164        | Fluidigm RRID: AB_2814683                   |
| CCR2            | 475301       | Ho165        | R&D Systems RRID: AB_10718414               |
| CX3CR1          | SA011F11     | Er166        | Biolegend RRID: AB_2564313                  |
| CD115           | AFS98        | Er167        | Biolegend RRID: AB_2563709                  |
| CD116 (GMSFR)   | 698423       | Er168        | ThermoFisher Scientific RRID<br>AB_2608189  |
| PD-L1 (CD274)   | MIH5         | Tm169        | Thermo Fisher Scientific RRID:<br>AB_467781 |
| Langerin        | L31          | Er170        | ThermoFisher Scientific RRID<br>AB_763454   |
| CD103           | M290         | Er171        | BD Pharmingen RRID: AB_394995               |
| CD86            | GL1          | Yb172        | Biolegend RRID: AB_313144                   |

|              |         |       |                                           |
|--------------|---------|-------|-------------------------------------------|
| CD117/c-kit  | 2B8     | Yb173 | Fluidigm RRID: AB_2811230                 |
| CD135 (FLT3) | A2F10   | Yb174 | ThermoFisher Scientific RRID<br>AB_467481 |
| CADM1        | 3E1     | Lu175 | MBL RRID: AB_592783                       |
| IRF8         | V3GYWCH | Yb176 | ThermoFisher Scientific Custom Order      |

**Table S6. List of Primers and custom oligos.**

List of primers used for qPCR analysis, sequencing, and gRNA oligos.

| <b>Primer</b>                                | <b>Forward (5'-&gt;3')</b> | <b>Reverse (5'-&gt;3')</b> |
|----------------------------------------------|----------------------------|----------------------------|
| <i>Ifnb</i>                                  | AGCTCCAAGAAAGGACGAACA      | GCCCTGTAGGTGAGGTTGAT       |
| <i>Ifna</i>                                  | TGACCTCAACACTCAGCTCAA      | AGGTGCCTGTATCTCTACCTG      |
| <i>Isg15</i>                                 | AGTGATGCTAGTGGTACAGAACT    | CAGTCTGCGTCAGAAAGACCT      |
| <i>Ccl2</i>                                  | TAAAAACCTGGATCGGAACCAAA    | GCATTAGCTTCAGATTTACGGGT    |
| <i>Rpl13a</i>                                | ATGACAAGAAAAAGCGGATG       | CTTTTCTGCCTGTTTCCGTA       |
| <i>Cxcl10</i>                                | CCAAGTGCTGCCGTCATTTTC      | CCAAGTGCTGCCGTCATTTTC      |
| <i>Ccl5</i>                                  | TTTGCCTACCTCTCCCTCG        | CGACTGCAAGATTGGAGCACT      |
| <b>Custom gRNA oligos (5'-&gt;3')</b>        |                            |                            |
| <i>Sting1 knockout</i>                       | CACCGGTCCAAGTTCGTGCGAGGCT  |                            |
| <i>Sting1 knockout</i>                       | AAACAGCCTCGCACGAACTTGGACC  |                            |
| <b>Sanger Sequencing Primers (5'-&gt;3')</b> |                            |                            |
| <i>Sting1 primer_1</i>                       | AGGACCAGAAGGCCAAACATC      |                            |
| <i>Sting1 primer_2</i>                       | GATGCCATACTCCAACCTGC       |                            |



**Table S7. List of software and algorithms**

| <b>Software and Algorithms</b>   | <b>Source</b>           | <b>Reference</b>                                                                                                    |
|----------------------------------|-------------------------|---------------------------------------------------------------------------------------------------------------------|
| GraphPad Prism 9                 | GraphPad Software, Inc. | <a href="https://www.graphpad.com/scientificsoftware/prism/">https://www.graphpad.com/scientificsoftware/prism/</a> |
| FlowJo Software v10.7.2          | TreeStar, Inc.          | <a href="https://www.flowjo.com/solutions/flow-jo">https://www.flowjo.com/solutions/flow-jo</a>                     |
| UMAP (Flowjo plugin)             | N/A                     | <a href="https://github.com/lmcinnes/umap">https://github.com/lmcinnes/umap</a>                                     |
| R                                | N/A                     | <a href="https://www.R-project.org/">https://www.R-project.org/</a>                                                 |
| ggplot2 v2.2.1                   | N/A                     | <a href="https://github.com/tidyverse/ggplot2">https://github.com/tidyverse/ggplot2</a>                             |
| X-shift (Flowjo plugin)          | (23)                    | <a href="https://github.com/nolanlab/vortex">https://github.com/nolanlab/vortex</a>                                 |
| ROSALIND®                        | N/A                     | <a href="https://rosalind.bio/">https://rosalind.bio/</a>                                                           |
| ParkerICI/Premessa R package     | N/A                     | <a href="https://github.com/ParkerICI/premessa">https://github.com/ParkerICI/premessa</a>                           |
| MSFragger (version 3.4)          | N/A                     | <a href="https://github.com/Nesvilab/MSFragger">https://github.com/Nesvilab/MSFragger</a>                           |
| Fragpipe software (version 17.0) | (91)                    | <a href="https://github.com/Nesvilab/FragPipe">https://github.com/Nesvilab/FragPipe</a>                             |
